# Supplementary material for: MyD88 signaling causes autoimmune sialadenitis through formation of high endothelial venules and upregulation of LTβ receptor-mediated signaling
Source: PubMed Central journal article supplement (PMC6155371; doi:10.1038/s41598-018-32690-x), 2018-09-24
Supplement: 41598_2018_32690_MOESM1_ESM.pdf [file 41598_2018_32690_MOESM1_ESM.pdf]

## Supplementary Information

# **MyD88 signaling causes autoimmune sialadenitis through formation of high endothelial venules and upregulation of LT $\beta$ receptor-mediated signaling**

Takeshi Into<sup>1\*</sup>, Shumpei Niida<sup>2</sup> & Ken-ichiro Shibata<sup>3</sup>

<sup>1</sup>Department of Oral Microbiology, Division of Oral Infections and Health Sciences, Asahi University School of Dentistry, Mizuho, Japan.

<sup>2</sup>Medical Genome Center, National Center for Geriatrics and Gerontology, Obu, Japan.

<sup>3</sup>Laboratory of Oral Molecular Microbiology, Department of Oral Pathobiological Science, Hokkaido University Graduate School of Dental Medicine, Hokkaido, Japan.

\*Correspondence should be addressed to T.I. (into@dent.asahi-u.ac.jp)

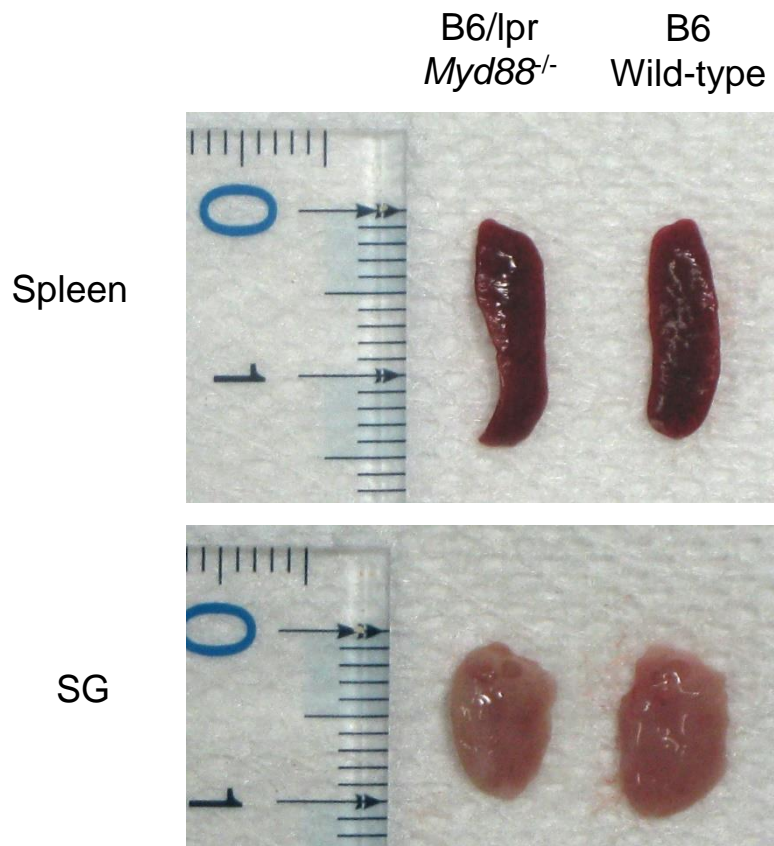

**Supplementary Figure 1. Splens and SGs extracted from *Myd88*-deficient B6/lpr and wild-type C57BL/6 mice.**

Representative spleen (upper) and SGs (with SGALNs; lower) collected from 24-week-old female *Myd88*-deficient B6/lpr (left) and wild-type C57BL/6 (right) are shown.

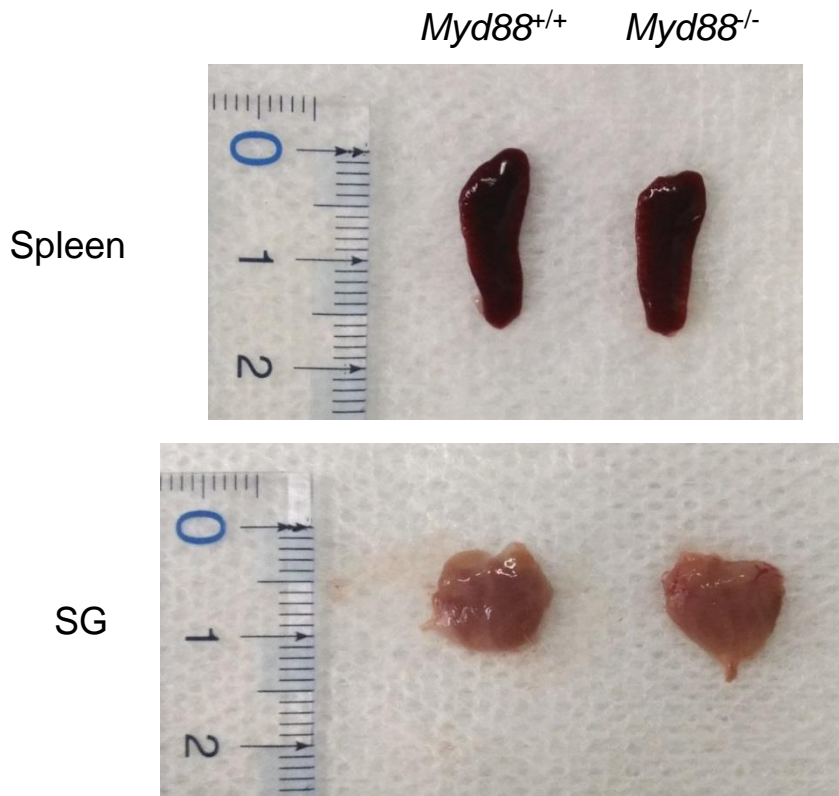

**Supplementary Figure 2. Spleens and SGs extracted from wild-type and *Myd88*-deficient NOD mice.** Representative spleen (upper) and SGs (with SGALNs; lower) collected from 12-week-old female wild-type NOD (left) and *Myd88*-deficient NOD (right) are shown.

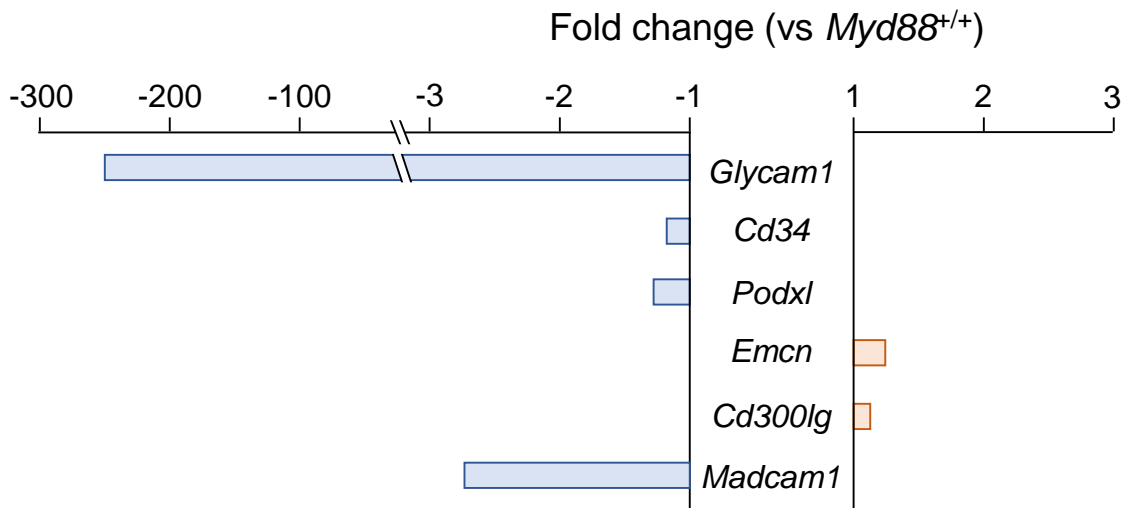

**Supplementary Figure 3. Microarray analysis of mRNA expression of HEV-associated CD62L ligands in SMGs from female *Myd88*-deficient B6 mice.**

Results show mRNA expression levels of HEV-associated CD62L ligands in SMGs from 10-week-old female *Myd88*-deficient B6 mice relative to those from wild-type mice (n = 3 per genotype).

*Myd88*<sup>+/+</sup>

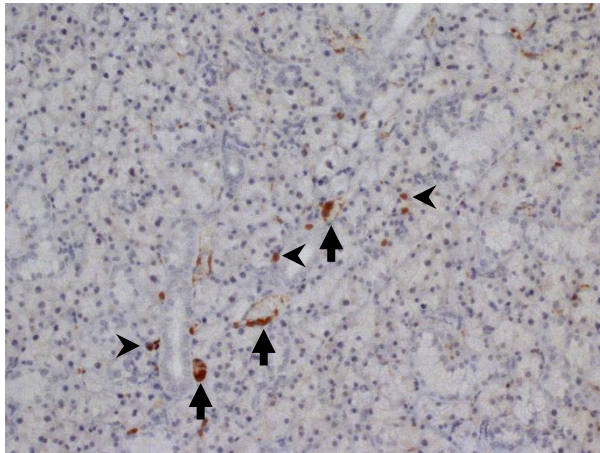

*Myd88*<sup>-/-</sup>

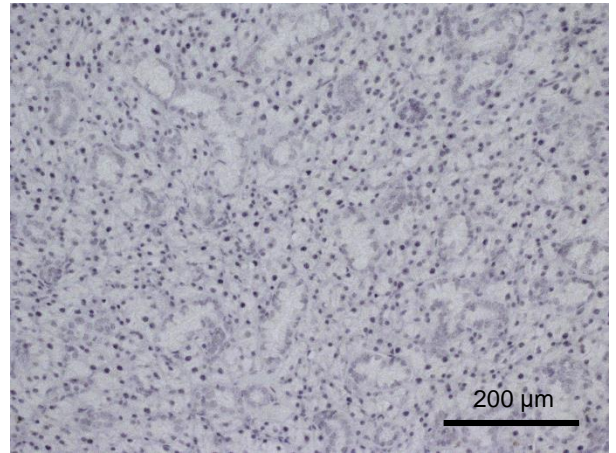

IHC:  $\alpha$ -PNAd

**Supplementary Figure 4. Immunohistochemical staining of PNAd in SGs from wild-type and *Myd88*-deficient B6 mice.**

Representative areas of anti-PNAd (MECA-79) antibody-stained sections of SGs from 10-week-old female wild-type (left) and *Myd88*-deficient (right) B6 mice. Arrows and arrowheads indicate HEV-like vessels and probable HEV precursor cells, respectively. Original magnification:  $\times 20$ . Additional images are shown in Fig. 3c.

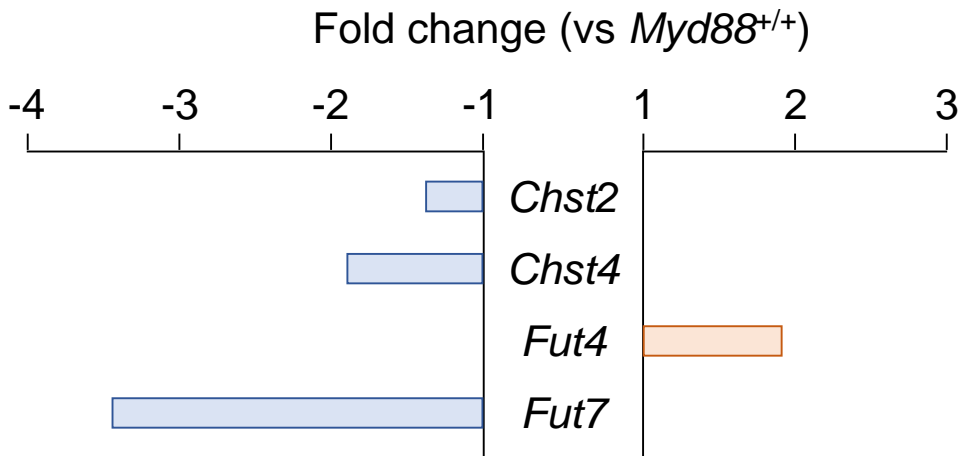

**Supplementary Figure 5. Microarray analysis of mRNA expression of HEV-associated enzymes in SMGs from female *Myd88*-deficient B6 mice.**

Results show mRNA expression levels HEV-associated enzymes in SMGs from 10-week-old female *Myd88*-deficient B6 mice relative to wild-type (n = 3 per genotype).

a

*Myd88*<sup>+/+</sup>

*Myd88*<sup>-/-</sup>

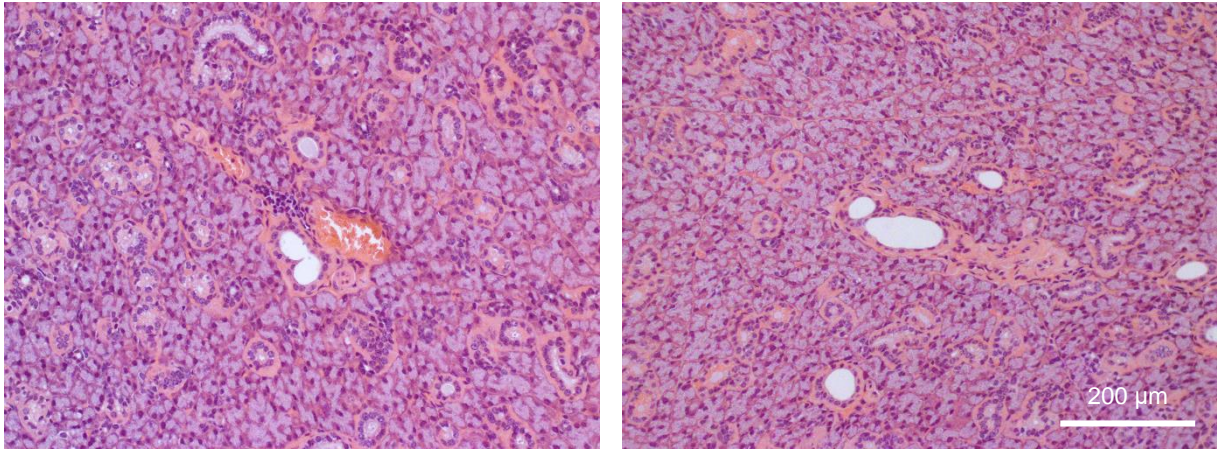

b

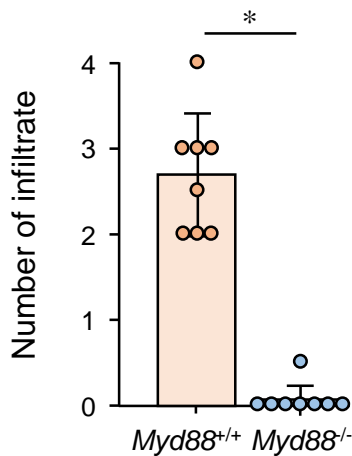

**Supplementary Figure 6. Histology of SGs from wild-type and *Myd88*-deficient B6 mice.**

(a) Representative areas of H&E-stained sections of SGs from 10-week-old female wild-type (left) and *Myd88*-deficient (right) B6 mice are shown. Original magnification:  $\times 20$ . Additional images are shown in Fig. 3d.

(b) Number of lymphocytic infiltrates in SG sections evaluated from eight mice per genotype. Results are expressed as mean  $\pm$  SD (bar graph) of mean values of total infiltrate numbers of four SG sections per animal (circle point). \*,  $p < 0.01$ .

*Myd88*<sup>+/+</sup>

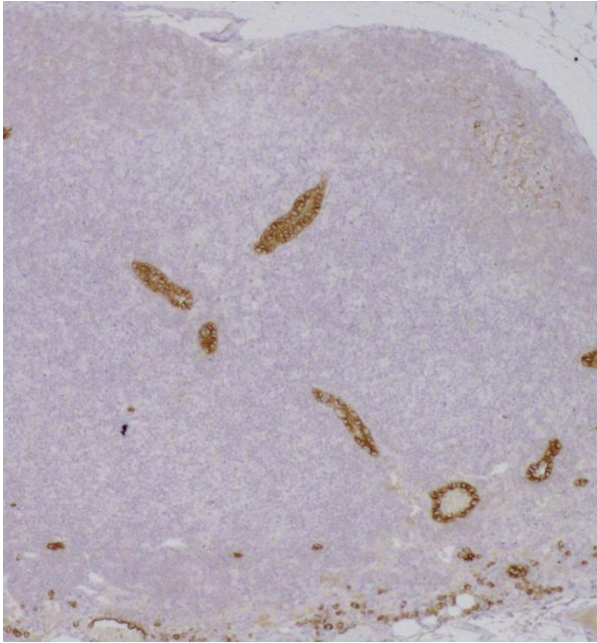

*Myd88*<sup>-/-</sup>

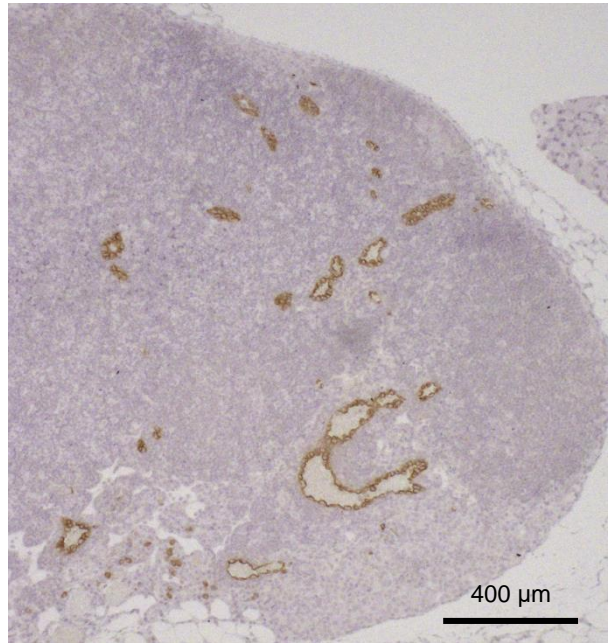

IHC: α-PNAd

**Supplementary Figure 7. Immunohistochemical staining of PNAd in SGALNs from wild-type and *Myd88*-deficient NOD mice.**

Representative areas of anti-PNAd (MECA-79) antibody-stained sections of SGALNs from 12-week-old female wild-type (left) and *Myd88*-deficient (right) NOD mice are shown. Original magnification: × 10.



Marker

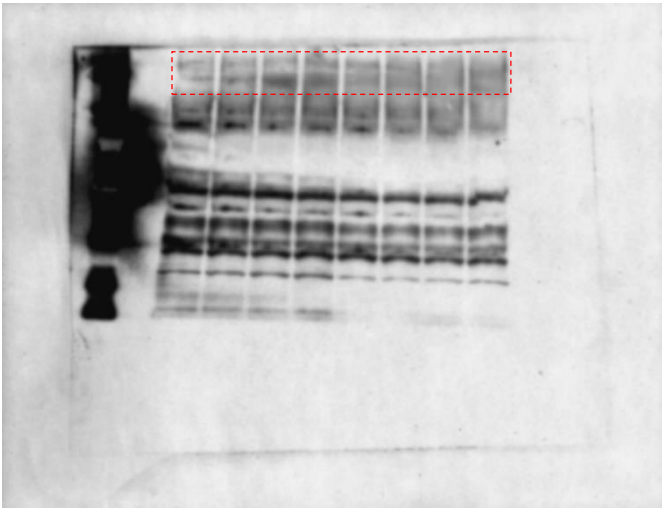

IB:  $\alpha$ -NIK

Marker

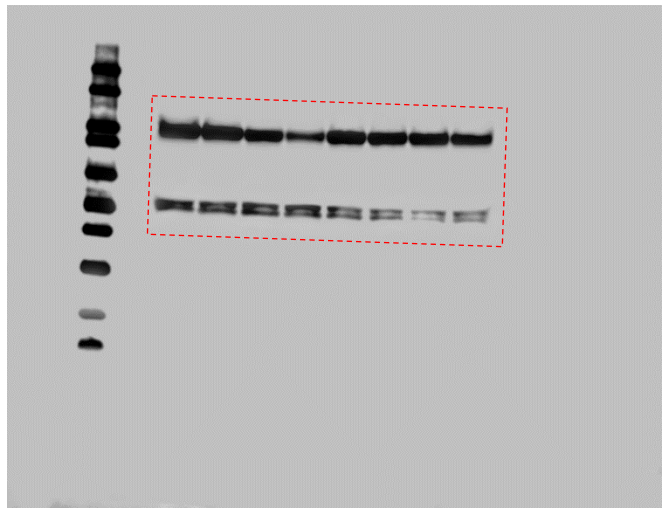

IB:  $\alpha$ -NF- $\kappa$ B2 (p100/p52)

Marker

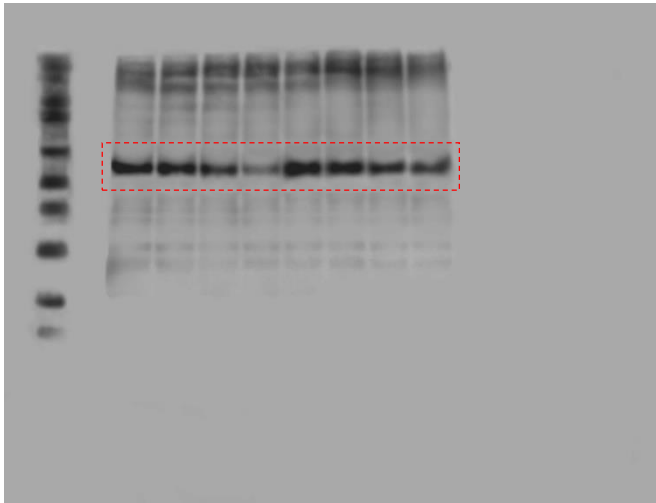

IB:  $\alpha$ -TRAF3

Marker

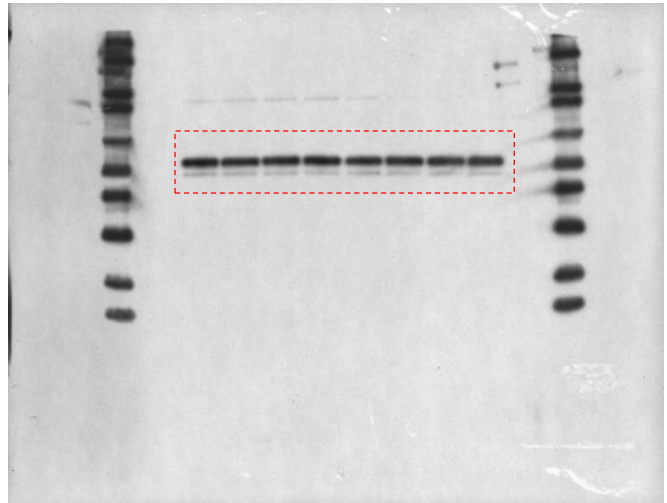

IB:  $\alpha$ - $\alpha$ -Tubulin

**Supplementary Figure 8. Uncropped images of immunoblot results of Fig. 6b.**

The full-length blots, showing NIK, NF- $\kappa$ B2 (p100/p52), TRAF3, and  $\alpha$ -tubulin, were obtained under the same experimental conditions. The cropped parts indicated by the boxes with red dashed lines are shown in Fig. 6b.

Supplementary Table 1. Complete list of the top 100 genes with the lowest P-value

| Ranking | Systematic Name | Gene Name     | Description                                                                                                                                                | P-value   | Fold change | Probe Name     |
|---------|-----------------|---------------|------------------------------------------------------------------------------------------------------------------------------------------------------------|-----------|-------------|----------------|
| 1       | NM_177823       | Ubash3a       | Mus musculus ubiquitin associated and SH3 domain containing, A (Ubash3a), mRNA [NM_177823]                                                                 | 4.078E-28 | -2.58       | A_51_P111532   |
| 2       | NM_030098       | Rnase6        | Mus musculus ribonuclease, RNase A family, 6 (Rnase6), mRNA [NM_030098]                                                                                    | 1.052E-26 | -2.53       | A_51_P104608   |
| 3       | NM_134210       | Vmn1r81       | Mus musculus vomeronasal 1 receptor 81 (Vmn1r81), mRNA [NM_134210]                                                                                         | 3.155E-26 | 2.55        | A_51_P115229   |
| 4       | NM_008134       | Glycam1       | Mus musculus glycosylation dependent cell adhesion molecule 1 (Glycam1), mRNA [NM_008134]                                                                  | 1.615E-23 | -251.36     | A_52_P602847   |
| 5       | BC019489        |               | Mus musculus immunoglobulin heavy chain 1a (serum IgG2a), mRNA (cDNA clone IMAGE:4011654). [BC019489]                                                      | 1.885E-23 | -109.13     | A_55_P1956598  |
| 6       | GQ984290        |               | immunoglobulin heavy chain 3 (serum IgG2b) Gene [Source:MGI Symbol;Acc:MGI:96445] [ENSMUST00000103418]                                                     | 2.342E-23 | -31.01      | A_55_P2063283  |
| 7       |                 | Unknown       |                                                                                                                                                            | 2.374E-23 | -48.47      | A_51_P461067   |
| 8       | XM_001472091    | Igh-VJ558     | predicted gene, 16844 Gene [Source:MGI Symbol;Acc:MGI:4439768] [ENSMUST00000103412]                                                                        | 2.522E-23 | -138.03     | A_55_P1960148  |
| 9       | XM_003085465    | Igh-VJ558     | predicted gene, 16844 Gene [Source:MGI Symbol;Acc:MGI:4439768] [ENSMUST00000103412]                                                                        | 2.646E-23 | -133.92     | A_51_P509679   |
| 10      | NM_152839       | Igj           | Mus musculus immunoglobulin joining chain (Igj), mRNA [NM_152839]                                                                                          | 2.716E-23 | -47.85      | A_51_P150710   |
| 11      | AM910933        |               | immunoglobulin kappa chain, constant region Gene [Source:MGI Symbol;Acc:MGI:96495] [ENSMUST00000103410]                                                    | 3.209E-23 | -95.09      | A_55_P2060897  |
| 12      | NM_026976       | Faim3         | Mus musculus Fas apoptotic inhibitory molecule 3 (Faim3), mRNA [NM_026976]                                                                                 | 3.617E-23 | -89.24      | A_51_P378298   |
| 13      |                 | Unknown       |                                                                                                                                                            | 5.118E-23 | -45.52      | A_55_P2145224  |
| 14      | NM_010389       | H2-Ob         | Mus musculus histocompatibility 2, O region beta locus (H2-Ob), mRNA [NM_010389]                                                                           | 5.177E-23 | -80.88      | A_55_P2082929  |
| 15      | NM_009844       | Cd19          | Mus musculus CD19 antigen (Cd19), mRNA [NM_009844]                                                                                                         | 7.742E-23 | -56.57      | A_55_P2079079  |
| 16      |                 | Unknown       |                                                                                                                                                            | 1.03E-22  | -16.11      | A_55_P2058040  |
| 17      | NM_008339       | Cd79b         | Mus musculus CD79B antigen (Cd79b), mRNA [NM_008339]                                                                                                       | 1.048E-22 | -35.12      | A_51_P342652   |
| 18      |                 | Unknown       |                                                                                                                                                            | 1.069E-22 | -38.14      | A_55_P2214124  |
| 19      | AK080018        |               | Mus musculus adult male aorta and vein cDNA, RIKEN full-length enriched library, clone:A530047M13 product:unclassifiable, full insert sequence. [AK080018] | 1.11E-22  | 49.78       | A_55_P2102881  |
| 20      | NM_009835       | Ccr6          | Mus musculus chemokine (C-C motif) receptor 6 (Ccr6), transcript variant 1, mRNA [NM_009835]                                                               | 1.132E-22 | -14.86      | A_55_P2108943  |
| 21      |                 | Unknown       |                                                                                                                                                            | 1.221E-22 | -31.10      | A_51_P483576   |
| 22      | AY170502        |               | immunoglobulin lambda chain, constant region 2 Gene [Source:MGI Symbol;Acc:MGI:99547] [ENSMUST00000103749]                                                 | 1.293E-22 | -34.63      | A_55_P2057283  |
| 23      | NM_007641       | Ms4a1         | Mus musculus membrane-spanning 4-domains, subfamily A, member 1 (Ms4a1), mRNA [NM_007641]                                                                  | 1.439E-22 | -71.84      | A_55_P2043336  |
| 24      | NM_001164059    | Sell          | Mus musculus selectin, lymphocyte (Sell), transcript variant 2, mRNA [NM_001164059]                                                                        | 1.627E-22 | -32.51      | A_55_P2010152  |
| 25      | NM_011177       | Klk6          | Mus musculus kallikrein related-peptidase 6 (Klk6), transcript variant 1, mRNA [NM_011177]                                                                 | 1.701E-22 | -16.30      | A_55_P2128591  |
| 26      |                 |               | lincRNA:chr5:107503800-107515575 reverse strand                                                                                                            | 1.905E-22 | 42.61       | A_30_P01017987 |
| 27      |                 |               | lincRNA:chr4:89048647-89066563 forward strand                                                                                                              | 1.972E-22 | -19.56      | A_30_P01032359 |
| 28      | XR_105809       |               | immunoglobulin lambda chain, constant region 1 Gene [Source:MGI Symbol;Acc:MGI:99546] [ENSMUST00000103741]                                                 | 2.554E-22 | -18.91      | A_55_P2111322  |
| 29      |                 |               | lincRNA:chr7:112934153-112943178 reverse strand                                                                                                            | 2.586E-22 | -1.55       | A_30_P01032903 |
| 30      | NM_001037719    | Btla          | Mus musculus B and T lymphocyte associated (Btla), transcript variant 1, mRNA [NM_001037719]                                                               | 2.738E-22 | -30.60      | A_55_P1964648  |
| 31      |                 | Unknown       |                                                                                                                                                            | 2.786E-22 | -16.71      | A_55_P2209914  |
| 32      | XM_003084474    |               | Putative uncharacterized protein AI607873 [Source:UniProtKB/TrEMBL;Acc:D3Z2E7] [ENSMUST00000042610]                                                        | 2.91E-22  | -7.95       | A_51_P325281   |
| 33      | AK016784        | 4933412A08Rik | Mus musculus adult male testis cDNA, RIKEN full-length enriched library, clone:4933412A08 product:unclassifiable, full insert sequence. [AK016784]         | 3.231E-22 | 53.23       | A_52_P204035   |
| 34      | NM_027763       | Trem1         | Mus musculus triggering receptor expressed on myeloid cells-like 1 (Trem1), mRNA [NM_027763]                                                               | 3.233E-22 | -13.12      | A_51_P279062   |
| 35      |                 | Unknown       |                                                                                                                                                            | 3.531E-22 | -22.62      | A_55_P1977451  |
| 36      |                 |               | lincRNA:chr12:111617728-111665403 reverse strand                                                                                                           | 3.864E-22 | -2.37       | A_30_P01019746 |
| 37      |                 | Unknown       |                                                                                                                                                            | 3.979E-22 | -19.91      | A_55_P2186978  |
| 38      |                 | Unknown       |                                                                                                                                                            | 4.753E-22 | -13.68      | A_55_P2108311  |
| 39      | NM_001162940    | Gm10081       | Mus musculus predicted gene 10081 (Gm10081), mRNA [NM_001162940]                                                                                           | 4.872E-22 | -6.82       | A_55_P2104412  |
| 40      |                 |               | lincRNA:chr2:10237649-10287591 forward strand                                                                                                              | 4.924E-22 | 31.18       | A_30_P01027645 |
| 41      | NM_011681       | Scgb1a1       | Mus musculus secretoglobin, family 1A, member 1 (uteroglobin) (Scgb1a1), mRNA [NM_011681]                                                                  | 5.534E-22 | -1.30       | A_51_P128575   |
| 42      |                 | Unknown       |                                                                                                                                                            | 5.677E-22 | -9.06       | A_55_P1987406  |
| 43      | S77453          |               | immunoglobulin heavy constant gamma 1 (G1m marker) Gene [Source:MGI Symbol;Acc:MGI:96446] [ENSMUST00000103421]                                             | 6.126E-22 | -14.50      | A_55_P2066173  |
| 44      |                 |               | lincRNA:chr12:33808493-33829143 forward strand                                                                                                             | 7.05E-22  | 45.40       | A_30_P01030788 |
| 45      | NM_009850       | Cd3g          | Mus musculus CD3 antigen, gamma polypeptide (Cd3g), mRNA [NM_009850]                                                                                       | 7.28E-22  | -7.02       | A_55_P2072771  |
| 46      | NM_013487       | Cd3d          | Mus musculus CD3 antigen, delta polypeptide (Cd3d), mRNA [NM_013487]                                                                                       | 7.51E-22  | -22.39      | A_51_P285206   |
| 47      |                 | Unknown       |                                                                                                                                                            | 7.995E-22 | -13.08      | A_55_P2058023  |
| 48      | NM_007719       | Ccr7          | Mus musculus chemokine (C-C motif) receptor 7 (Ccr7), mRNA [NM_007719]                                                                                     | 8.299E-22 | -21.11      | A_55_P2023542  |
| 49      | NM_009394       | Tnnc2         | Mus musculus troponin C2, fast (Tnnc2), mRNA [NM_009394]                                                                                                   | 1.289E-21 | -115.03     | A_51_P353232   |
| 50      |                 |               | lincRNA:chr13:59245617-59245945 reverse strand                                                                                                             | 1.32E-21  | -12.28      | A_30_P01031668 |
| 51      | NM_010689       | Lat           | Mus musculus linker for activation of T cells (Lat), mRNA [NM_010689]                                                                                      | 1.374E-21 | -4.19       | A_51_P495242   |
| 52      | NM_007551       | Cxcr5         | Mus musculus chemokine (C-X-C motif) receptor 5 (Cxcr5), mRNA [NM_007551]                                                                                  | 1.659E-21 | -12.52      | A_52_P70796    |
| 53      |                 |               | lincRNA:chr11:63054652-63131714 reverse strand                                                                                                             | 1.819E-21 | -4.21       | A_30_P01030688 |
| 54      | NM_001110276    | Itns1         | Mus musculus intersectin 1 (SH3 domain protein 1A) (Itns1), transcript variant 3, mRNA [NM_001110276]                                                      | 2.028E-21 | 30.69       | A_51_P1958062  |
| 55      | NM_001011810    | Olf4r485      | Mus musculus olfactory receptor 485 (Olf4r485), mRNA [NM_001011810]                                                                                        | 2.08E-21  | 21.86       | A_51_P147188   |
| 56      | AF045501        |               | predicted gene, 16746 Gene [Source:MGI Symbol;Acc:MGI:4439670] [ENSMUST00000109705]                                                                        | 2.092E-21 | -9.33       | A_52_P213483   |
| 57      | U07661          |               | T-cell receptor beta-2 chain C region [Source:UniProtKB/Swiss-Prot;Acc:P01851] [ENSMUST00000103299]                                                        | 2.834E-21 | -13.21      | A_51_P478172   |
| 58      | U58290          | LOC639930     | Mus musculus J558+ IgM heavy chain mRNA, partial cds. [U58290]                                                                                             | 2.86E-21  | -18.39      | A_55_P2065506  |
| 59      |                 |               | lincRNA:chr15:38639259-38639546 reverse strand                                                                                                             | 3.949E-21 | -1.31       | A_30_P01023385 |
| 60      | NM_007650       | Cd5           | Mus musculus CD5 antigen (Cd5), mRNA [NM_007650]                                                                                                           | 4.46E-21  | -9.60       | A_51_P167263   |
| 61      | NM_133809       | Kmo           | Mus musculus kynurenine 3-monooxygenase (kynurenine 3-hydroxylase) (Kmo), mRNA [NM_133809]                                                                 | 4.461E-21 | -5.40       | A_55_P2145606  |
| 62      | M57280          |               | predicted gene, 16939 Gene [Source:MGI Symbol;Acc:MGI:4439863] [ENSMUST00000103320]                                                                        | 4.911E-21 | -12.16      | A_51_P390937   |
| 63      | NM_145141       | Fcrla         | Mus musculus Fc receptor-like A (Fcrla), transcript variant 2, mRNA [NM_145141]                                                                            | 6.195E-21 | -24.52      | A_51_P154485   |
| 64      | NM_019866       | Spib          | Mus musculus Spi-B transcription factor (Spi-1/PU.1 related) (Spib), mRNA [NM_019866]                                                                      | 7.537E-21 | -23.98      | A_55_P2113703  |
| 65      | X75105          |               | predicted gene, 16637 Gene [Source:MGI Symbol;Acc:MGI:4439561] [ENSMUST00000103328]                                                                        | 7.733E-21 | -6.94       | A_55_P2047589  |
| 66      | NM_001033791    | Gm12888       | Mus musculus predicted gene 12888 (Gm12888), mRNA [NM_001033791]                                                                                           | 7.937E-21 | 10.88       | A_66_P133702   |
| 67      | X59099          |               | predicted gene 1502 Gene [Source:MGI Symbol;Acc:MGI:2686348] [ENSMUST00000103348]                                                                          | 8.623E-21 | -22.83      | A_55_P2103948  |
| 68      | XM_890897       |               | Androgen-binding protein Fragment [Source:UniProtKB/TrEMBL;Acc:D2XZ31] [ENSMUST00000108097]                                                                | 8.646E-21 | 12.02       | A_55_P2022288  |
| 69      |                 |               | lincRNA:chr5:113594167-113645342 reverse strand                                                                                                            | 9.822E-21 | -1.77       | A_30_P01021739 |
| 70      |                 | Unknown       |                                                                                                                                                            | 9.911E-21 | -1.64       | A_55_P2144961  |
| 71      |                 |               | lincRNA:chr15:51829797-51844247 reverse strand                                                                                                             | 1.271E-20 | -1.54       | A_30_P01020668 |
| 72      | NM_031247       | Gimap3        | Mus musculus GTPase, IMAP family member 3 (Gimap3), nuclear gene encoding mitochondrial protein, mRNA [NM_031247]                                          | 1.301E-20 | -13.21      | A_55_P2003221  |
| 73      | BC117076        | 1700014N06Rik | Mus musculus RIKEN cDNA 1700014N06 gene, mRNA (cDNA clone MGC:151453 IMAGE:40126395), complete cds. [BC117076]                                             | 1.305E-20 | -16.16      | A_55_P1958047  |
| 74      |                 | Unknown       |                                                                                                                                                            | 1.372E-20 | 31.57       | A_55_P2131742  |
| 75      | NM_001163810    | 1700008P20Rik | Mus musculus RIKEN cDNA 1700008P20 gene (1700008P20Rik), mRNA [NM_001163810]                                                                               | 1.465E-20 | 1.79        | A_51_P128075   |
| 76      |                 | Unknown       |                                                                                                                                                            | 1.59E-20  | -7.50       | A_52_P320761   |
| 77      | AK007918        |               | immunoglobulin heavy chain 1b (serum IgG2c) Gene [Source:MGI Symbol;Acc:MGI:2686979] [ENSMUST00000103416]                                                  | 1.656E-20 | -13.09      | A_55_P2034655  |
| 78      | NM_001009952    | Abpd          | Mus musculus androgen binding protein delta (Abpd), mRNA [NM_001009952]                                                                                    | 1.717E-20 | 9.25        | A_55_P2057004  |
| 79      | NM_001033344    | Dusp27        | Mus musculus dual specificity phosphatase 27 (putative) (Dusp27), transcript variant 1, mRNA [NM_001033344]                                                | 1.897E-20 | -10.34      | A_51_P235088   |
| 80      | NM_013503       | Drd5          | Mus musculus dopamine receptor D5 (Drd5), mRNA [NM_013503]                                                                                                 | 2.281E-20 | -13.58      | A_52_P35394    |
| 81      | NM_010090       | Dusp2         | Mus musculus dual specificity phosphatase 2 (Dusp2), mRNA [NM_010090]                                                                                      | 2.625E-20 | -10.08      | A_52_P399934   |
| 82      | NM_028075       | Tnfrsf13c     | Mus musculus tumor necrosis factor receptor superfamily, member 13c (Tnfrsf13c), mRNA [NM_028075]                                                          | 2.741E-20 | -21.60      | A_55_P2117614  |
| 83      | NM_001037800    | Cd209b        | Mus musculus CD209b antigen (Cd209b), transcript variant 2, mRNA [NM_001037800]                                                                            | 2.822E-20 | -9.79       | A_52_P267717   |
| 84      | NM_009405       | Tnfr2         | Mus musculus troponin I, skeletal, fast 2 (Tnfr2), mRNA [NM_009405]                                                                                        | 3.009E-20 | -55.61      | A_55_P2040893  |
| 85      | NM_023483       | 1110032A03Rik | Mus musculus RIKEN cDNA 1110032A03 gene (1110032A03Rik), mRNA [NM_023483]                                                                                  | 3.377E-20 | -1.67       | A_55_P2023290  |
| 86      |                 | Unknown       |                                                                                                                                                            | 3.403E-20 | -9.73       | A_55_P1999715  |
| 87      |                 |               | lincRNA:chr14:52864224-52878449 forward strand                                                                                                             | 3.492E-20 | -2.51       | A_30_P01023608 |
| 88      | NM_001081369    | Ccdc153       | Mus musculus coiled-coil domain containing 153 (Ccdc153), mRNA [NM_001081369]                                                                              | 3.924E-20 | -3.49       | A_52_P352735   |
| 89      | NM_198635       | Gm5134        | Mus musculus predicted gene 5134 (Gm5134), mRNA [NM_198635]                                                                                                | 4.334E-20 | -1.20       | A_52_P235880   |
| 90      |                 |               | lincRNA:chr14:33895294-33923644 reverse strand                                                                                                             | 4.533E-20 | -1.03       | A_30_P01031245 |
| 91      | NM_001037906    | Nelf1         | Mus musculus NEL-like 1 (chicken) (Nelf1), mRNA [NM_001037906]                                                                                             | 4.728E-20 | 4.90        | A_55_P1967500  |
| 92      |                 |               | lincRNA:chr11:18479852-18485704 forward strand                                                                                                             | 4.96E-20  | -7.45       | A_30_P01027061 |
| 93      |                 |               | lincRNA:chr9:27148989-27155714 forward strand                                                                                                              | 5.186E-20 | 16.23       | A_30_P01023937 |
| 94      | NM_013645       | Pvalb         | Mus musculus parvalbumin (Pvalb), mRNA [NM_013645]                                                                                                         | 6.073E-20 | -161.02     | A_55_P2059040  |
| 95      | AY174043        |               | Mus musculus clone BaPB1-61 immunoglobulin heavy chain variable region mRNA, partial cds. [AY174043]                                                       | 6.089E-20 | -9.04       | A_55_P2001262  |
| 96      | AF296427        | LOC640979     | Mus musculus clone J558.B10 immunoglobulin heavy chain variable region mRNA, partial cds. [AF296427]                                                       | 6.532E-20 | -25.64      | A_51_P513776   |
| 97      | NR_028030       | Gm9767        | Mus musculus predicted gene 9767 (Gm9767), non-coding RNA [NR_028030]                                                                                      | 7.202E-20 | -2.16       | A_51_P247496   |
| 98      |                 |               | lincRNA:chr15:79764481-79809909 reverse strand                                                                                                             | 7.933E-20 | -1.29       | A_30_P01030130 |
| 99      |                 |               | lincRNA:chr15:38630866-38640611 reverse strand                                                                                                             | 8.909E-20 | -0.06       | A_30_P01026218 |
| 100     | NM_011414       | Sipi          | Mus musculus secretory leukocyte peptidase inhibitor (Sipi), mRNA [NM_011414]                                                                              | 8.944E-20 | -10.58      | A_52_P472324   |
